# Supplementary material for: Cellular determinants of metabolite concentration ranges
Source: PLoS Comput Biol. 2019 Jan 24;15(1):e1006687. doi: 10.1371/journal.pcbi.1006687 (PMC6345444; doi:10.1371/journal.pcbi.1006687)
Supplement: S4 Table — (A) Measured concentrations of SCC metabolites in E. coli under different growth scenarios. The three replicates at growth rate 0.2h-1 are used as reference state. Measured volumetric concentrations1 were converted to mmol/gDW by using a ratio of aqueous E. coli cell volume to dry weight of 0.0023L/g2. (B) Specific flux rates for E. coli grown under different scenarios. (XLSX) [file pcbi.1006687.s016.xlsx]

## Sheet: Metabolite
Table S4. (A) Measured concentrations of SCC metabolites in E. coli under different growth scenarios. The three replicates at growth rate 0.2h-1 are used as reference state. The concentration data in mM from Ishii et al. 2007 can be directly obtained from the project website http://ecoli.iab.keio.ac.jp/. Related to section "Concentration ranges in a genome-scale metabolic model of E. coli".																	Density (g/L)
Measured volumetric concentrations1 were converted to mmol/gDW by using a ratio of aqueous E. coli cell volume to dry weight of 0.0023L/g2
Sample ID	GR02	GR02	GR03	GR03	GR04	GR04		RF03	RF03	RF05	RF05	RF06	RF06
growth rate	0.4h-1		0.5h-1		0.7h-1			0.2h-1		0.2h-1		0.2h-1
unit concentration	mM	mmol/gDW	mM	mmol/gDW	mM	mmol/gDW		mM	mmol/gDW	mM	mmol/gDW	mM	mmol/gDW
Glutamate	5.16574	0.0118812	5.15484	0.0118561	2.60584	0.00599343		3.01916	0.00694406	3.26361	0.00750629	3.17501	0.00730253
Phosphoenolpyruvate	0.0694723	0.000159786	0.0476899	0.000109687	0.148913	0.000342499		0.174554	0.000401475		0	0.094574	0.00021752
2-Deoxyribose 1-phosphate	0.0279867	6.43693e-05	0.0383381	8.81776e-05		0		0.0186306	4.28504e-05	0.0950117	0.000218527	0.0407178	9.3651e-05
Pantothenate	0.0240633	5.53456e-05	0.0392976	9.03844e-05	0.0286672	6.59346e-05		0.0122841	2.82535e-05	0.0166467	3.82874e-05	0.016718	3.84513e-05
Ribulose 5-phosphate	0.0675075	0.000155267	0.0709627	0.000163214	0.168008	0.000386418		0.098268	0.000226016	0.113804	0.000261749	0.0933491	0.000214703
Sedoheptulose-7-phosphate	0.153855	0.000353867	0.125368	0.000288347	0.198077	0.000455577		0.178013	0.00040943	0.179788	0.000413512	0.200215	0.000460494
Homoserine	0.0107035	2.4618e-05	0.0094587	2.1755e-05		0		0.00488377	1.12327e-05		0	0.00970972	2.23324e-05
Gln	0.306979	0.000706052	0.403488	0.000928022	0.707991	0.00162838		0.449426	0.00103368	1.32334	0.00304369	0.370967	0.000853224
Arg	0.0690332	0.000158776	0.0652048	0.000149971	0.146871	0.000337804		0.0624492	0.000143633	0.0887536	0.000204133	0.0321454	7.39343e-05
cAMP	0.00403437	9.27906e-06	0.00581272	1.33693e-05	0.0192297	4.42283e-05		0.00785066	1.80565e-05	0.00551692	1.26889e-05	0.00223051	5.13017e-06
ATP	0.277881	0.000639126	0.311971	0.000717534	0.828333	0.00190517		1.95202	0.00448964	1.37413	0.00316051	0.263129	0.000605196
GTP	0.148991	0.00034268	0.147068	0.000338255	0.83086	0.00191098		0.892424	0.00205257	0.852358	0.00196042	0.126022	0.00028985
ADP-ribose	0.00203863	4.68884e-06	0.00318238	7.31949e-06	0.0373316	8.58626e-05		0.00623793	1.43472e-05	0.0194571	4.47513e-05	0.00204148	4.69541e-06
UDP-N-acetylglucosamine	0.0849908	0.000195479	0.132252	0.000304179	0.579903	0.00133378		0.142242	0.000327157	0.324386	0.000746088	0.0378472	8.70486e-05
NAD	0.296096	0.00068102	0.407751	0.000937828	1.37463	0.00316165		0.762897	0.00175466	1.25158	0.00287864	0.208828	0.000480304
1: Bennett et al. Nature Chemical Biology 5, 593-599, 2009
2: Bennett et al. Nature Protocols 3, 1299-1311, 2008

## Sheet: Specific_Rates
Table S4. (B) Specific flux rates for E. coli grown under different scenarios. Related to section "Concentration ranges in a genome-scale metabolic model of E. coli".
Sample ID	GR02	GR03	GR04		RF03	RF05	RF06
growth rate	0.4h-1	0.5h-1	0.7h-1		0.2h-1	0.2h-1	0.2h-1
unit flux	mmol/gDW/h	mmol/gDW/h	mmol/gDW/h		mmol/gDW/h	mmol/gDW/h	mmol/gDW/h
Glucose consumption rate	5.04945	6.63233	13.3438		3.27582	2.85625	2.66933
Oxygen uptake rate (OUR)	9.56904	13.0522	14.8673		1.06273	6.64306	9.66927
Carbon dioxide evolution rate (CER)	7.88039	8.94592	10.8319		6.19926	3.0898	3.03067
